# Supplementary material for: Integration of Information and Scientific Literacy: Promoting Literacy in Undergraduates
Source: Atypon-hosted journal article supplement (doi:10.1187/cbe.10-01-0006), 2010-12-01
Supplement: supp_1.pdf [file supp_1.pdf]

Compilation of student responses on the pre- and post-tests for 2008, 2009 and the combined average. Question numbers correspond to the numbers listed on the pre-/post-test.

| 2008 Relevancy      |        |         |        | 2009 Relevancy |                     |        |         | Combined Years |         |                     |        |       |         |       |        |       |         |       |
|---------------------|--------|---------|--------|----------------|---------------------|--------|---------|----------------|---------|---------------------|--------|-------|---------|-------|--------|-------|---------|-------|
| Pre                 |        | Post    |        | Pre            |                     | Post   |         | Pre            |         |                     |        | Post  |         |       |        |       |         |       |
| Question # 1        | Number | Percent | Number | Percent        | Question # 1        | Number | Percent | Number         | Percent | Question # 1        | Number | Range | Percent | Range | Number | Range | Percent | Range |
| Total No. Students  | 359    | 100     | 359    | 100            | Total No. Students  | 367    | 100     | 367            | 100     | Total No. Students  | 363    | 4     | 100     | 0     | 363    | 4     | 100     | 0     |
| Extremely Relevant  | 37     | 10      | 78     | 22             | Extremely Relevant  | 39     | 11      | 75             | 20      | Extremely Relevant  | 38     | 1     | 10      | 0     | 77     | 2     | 21      | 1     |
| Very Relevant       | 90     | 25      | 123    | 34             | Very Relevant       | 119    | 32      | 132            | 36      | Very Relevant       | 105    | 15    | 29      | 4     | 128    | 5     | 35      | 1     |
| Relevant            | 145    | 40      | 104    | 29             | Relevant            | 118    | 32      | 105            | 29      | Relevant            | 132    | 14    | 36      | 4     | 105    | 1     | 29      | 0     |
| Somewhat Relevant   | 65     | 18      | 51     | 14             | Somewhat Relevant   | 77     | 21      | 50             | 14      | Somewhat Relevant   | 71     | 6     | 20      | 1     | 51     | 1     | 14      | 0     |
| Not at all Relevant | 7      | 2       | 2      | 1              | Not at all Relevant | 10     | 3       | 6              | 2       | Not at all Relevant | 9      | 2     | 2       | 0     | 4      | 2     | 1       | 1     |
| Unable to Judge     | 14     | 4       | 0      | 0              | Unable to Judge     | 5      | 1       | 0              | 0       | Unable to Judge     | 10     | 5     | 3       | 1     | 0      | 0     | 0       | 0     |

  

| 2008 Relevancy      |        |         |        | 2009 Relevancy |                     |        |         | Combined Years |         |                     |        |       |         |       |        |       |         |       |
|---------------------|--------|---------|--------|----------------|---------------------|--------|---------|----------------|---------|---------------------|--------|-------|---------|-------|--------|-------|---------|-------|
| Pre                 |        | Post    |        | Pre            |                     | Post   |         | Pre            |         |                     |        | Post  |         |       |        |       |         |       |
| Question # 2        | Number | Percent | Number | Percent        | Question # 2        | Number | Percent | Number         | Percent | Question # 2        | Number | Range | Percent | Range | Number | Range | Percent | Range |
| Total No. Students  | 359    | 100     | 359    | 100            | Total No. Students  | 367    | 100     | 367            | 100     | Total No. Students  | 363    | 4     | 100     | 0     | 363    | 4     | 100     | 0     |
| Extremely Relevant  | 53     | 15      | 103    | 29             | Extremely Relevant  | 59     | 16      | 81             | 22      | Extremely Relevant  | 56     | 3     | 15      | 1     | 92     | 11    | 25      | 3     |
| Very Relevant       | 120    | 33      | 116    | 32             | Very Relevant       | 130    | 35      | 151            | 41      | Very Relevant       | 125    | 5     | 34      | 1     | 134    | 18    | 37      | 4     |
| Relevant            | 121    | 34      | 97     | 27             | Relevant            | 115    | 31      | 93             | 25      | Relevant            | 118    | 3     | 33      | 1     | 95     | 2     | 26      | 1     |
| Somewhat Relevant   | 49     | 14      | 41     | 11             | Somewhat Relevant   | 52     | 14      | 38             | 10      | Somewhat Relevant   | 51     | 2     | 14      | 0     | 40     | 2     | 11      | 1     |
| Not at all Relevant | 7      | 2       | 0      | 0              | Not at all Relevant | 4      | 1       | 4              | 1       | Not at all Relevant | 6      | 2     | 2       | 0     | 2      | 2     | 1       | 1     |
| Unable to Judge     | 7      | 2       | 1      | 0              | Unable to Judge     | 8      | 2       | 1              | 0       | Unable to Judge     | 8      | 1     | 2       | 0     | 1      | 0     | 0       | 0     |

  

| 2008 Relevancy      |        |         |        | 2009 Relevancy |                     |        |         | Combined Years |         |                     |        |       |         |       |        |       |         |       |
|---------------------|--------|---------|--------|----------------|---------------------|--------|---------|----------------|---------|---------------------|--------|-------|---------|-------|--------|-------|---------|-------|
| Pre                 |        | Post    |        | Pre            |                     | Post   |         | Pre            |         |                     |        | Post  |         |       |        |       |         |       |
| Question # 3        | Number | Percent | Number | Percent        | Question # 3        | Number | Percent | Number         | Percent | Question # 3        | Number | Range | Percent | Range | Number | Range | Percent | Range |
| Total No. Students  | 359    | 100     | 359    | 100            | Total No. Students  | 367    | 100     | 367            | 100     | Total No. Students  | 363    | 4     | 100     | 0     | 363    | 4     | 100     | 0     |
| Extremely Relevant  | 144    | 40      | 162    | 45             | Extremely Relevant  | 154    | 42      | 142            | 39      | Extremely Relevant  | 149    | 5     | 41      | 1     | 152    | 10    | 42      | 3     |
| Very Relevant       | 103    | 29      | 102    | 28             | Very Relevant       | 125    | 34      | 120            | 33      | Very Relevant       | 114    | 11    | 31      | 3     | 111    | 9     | 31      | 2     |
| Relevant            | 74     | 21      | 70     | 19             | Relevant            | 60     | 16      | 74             | 20      | Relevant            | 67     | 7     | 18      | 2     | 72     | 2     | 20      | 0     |
| Somewhat Relevant   | 32     | 9       | 21     | 6              | Somewhat Relevant   | 23     | 6       | 29             | 8       | Somewhat Relevant   | 28     | 5     | 8       | 1     | 25     | 4     | 7       | 1     |
| Not at all Relevant | 3      | 1       | 1      | 0              | Not at all Relevant | 5      | 1       | 3              | 1       | Not at all Relevant | 4      | 1     | 1       | 0     | 2      | 1     | 1       | 0     |
| Unable to Judge     | 1      | 0       | 2      | 1              | Unable to Judge     | 1      | 0       | 0              | 0       | Unable to Judge     | 1      | 0     | 0       | 0     | 1      | 1     | 1       | 0     |

  

| 2008 Knowledge     |        |         |        | 2009 Knowledge |                    |        |         | Combined Years |         |                    |        |       |         |       |        |       |         |       |
|--------------------|--------|---------|--------|----------------|--------------------|--------|---------|----------------|---------|--------------------|--------|-------|---------|-------|--------|-------|---------|-------|
| Pre                |        | Post    |        | Pre            |                    | Post   |         | Pre            |         |                    |        | Post  |         |       |        |       |         |       |
| Question # 4       | Number | Percent | Number | Percent        | Question # 4       | Number | Percent | Number         | Percent | Question # 4       | Number | Range | Percent | Range | Number | Range | Percent | Range |
| Total No. Students | 359    | 100     | 359    | 100            | Total No. Students | 367    | 100     | 367            | 100     | Total No. Students | 363    | 4     | 100     | 0     | 363    | 4     | 100     | 0     |
| Correct            | 298    | 83      | 338    | 94             | Correct            | 311    | 85      | 361            | 98      | Correct            | 305    | 7     | 84      | 1     | 350    | 12    | 96      | 2     |
| Incorrect          | 61     | 17      | 21     | 6              | Incorrect          | 56     | 15      | 6              | 2       | Incorrect          | 59     | 3     | 16      | 1     | 14     | 8     | 4       | 2     |

  

| 2008 Knowledge     |        |         |        | 2009 Knowledge |                    |        |         | Combined Years |         |                    |        |       |         |       |        |       |         |       |
|--------------------|--------|---------|--------|----------------|--------------------|--------|---------|----------------|---------|--------------------|--------|-------|---------|-------|--------|-------|---------|-------|
| Pre                |        | Post    |        | Pre            |                    | Post   |         | Pre            |         |                    |        | Post  |         |       |        |       |         |       |
| Question # 5       | Number | Percent | Number | Percent        | Question # 5       | Number | Percent | Number         | Percent | Question # 5       | Number | Range | Percent | Range | Number | Range | Percent | Range |
| Total No. Students | 359    | 100     | 359    | 100            | Total No. Students | 367    | 100     | 367            | 100     | Total No. Students | 363    | 4     | 100     | 0     | 363    | 4     | 100     | 0     |
| Correct            | 141    | 39      | 285    | 79             | Correct            | 177    | 48      | 280            | 76      | Correct            | 159    | 18    | 44      | 4     | 283    | 3     | 78      | 2     |
| Incorrect          | 218    | 61      | 74     | 21             | Incorrect          | 190    | 52      | 87             | 24      | Incorrect          | 204    | 14    | 56      | 4     | 81     | 7     | 22      | 2     |

  

| 2008 Knowledge     |        |         |        | 2009 Knowledge |                    |        |         | Combined Years |         |                    |        |       |         |       |        |       |         |       |
|--------------------|--------|---------|--------|----------------|--------------------|--------|---------|----------------|---------|--------------------|--------|-------|---------|-------|--------|-------|---------|-------|
| Pre                |        | Post    |        | Pre            |                    | Post   |         | Pre            |         |                    |        | Post  |         |       |        |       |         |       |
| Question # 6       | Number | Percent | Number | Percent        | Question # 6       | Number | Percent | Number         | Percent | Question # 6       | Number | Range | Percent | Range | Number | Range | Percent | Range |
| Total No. Students | 359    | 100     | 359    | 100            | Total No. Students | 367    | 100     | 367            | 100     | Total No. Students | 363    | 4     | 100     | 0     | 363    | 4     | 100     | 0     |
| 0                  | 88     | 25      | 24     | 7              | 0                  | 56     | 15      | 9              | 2       | 0                  | 72     | 16    | 20      | 5     | 17     | 8     | 5       | 2     |
| 1-2                | 175    | 49      | 237    | 66             | 1-2                | 154    | 42      | 165            | 45      | 1-2                | 165    | 11    | 45      | 3     | 201    | 36    | 55      | 11    |
| 3-4                | 58     | 16      | 63     | 18             | 3-4                | 103    | 28      | 128            | 35      | 3-4                | 81     | 23    | 22      | 6     | 96     | 33    | 26      | 9     |
| 5-6                | 22     | 6       | 17     | 5              | 5-6                | 26     | 7       | 43             | 12      | 5-6                | 24     | 2     | 7       | 0     | 30     | 13    | 8       | 3     |
| 7 or more          | 15     | 4       | 17     | 5              | 7 or more          | 29     | 8       | 23             | 6       | 7 or more          | 22     | 7     | 6       | 2     | 20     | 3     | 6       | 1     |

  

| 2008 Knowledge     |        |         |        | 2009 Knowledge |                    |        |         | Combined Years |         |                    |        |       |         |       |        |       |         |       |
|--------------------|--------|---------|--------|----------------|--------------------|--------|---------|----------------|---------|--------------------|--------|-------|---------|-------|--------|-------|---------|-------|
| Pre                |        | Post    |        | Pre            |                    | Post   |         | Pre            |         |                    |        | Post  |         |       |        |       |         |       |
| Question # 7       | Number | Percent | Number | Percent        | Question # 7       | Number | Percent | Number         | Percent | Question # 7       | Number | Range | Percent | Range | Number | Range | Percent | Range |
| Total No. Students | 359    | 100     | 359    | 100            | Total No. Students | 367    | 100     | 367            | 100     | Total No. Students | 363    | 4     | 100     | 0     | 363    | 4     | 100     | 0     |
| 0                  | 30     | 8       | 19     | 5              | 0                  | 15     | 4       | 8              | 2       | 0                  | 23     | 8     | 6       | 2     | 14     | 6     | 4       | 2     |
| 1-5                | 201    | 56      | 184    | 51             | 1-5                | 193    | 53      | 196            | 53      | 1-2                | 197    | 4     | 54      | 2     | 190    | 6     | 52      | 1     |
| 6-10               | 72     | 20      | 81     | 23             | 6-10               | 99     | 27      | 94             | 26      | 3-4                | 86     | 14    | 24      | 3     | 88     | 7     | 24      | 2     |
| 11-15              | 24     | 7       | 33     | 9              | 11-15              | 31     | 8       | 47             | 13      | 5-6                | 28     | 4     | 8       | 1     | 40     | 7     | 11      | 2     |
| 16 or more         | 31     | 9       | 41     | 11             | 16 or more         | 30     | 8       | 23             | 6       | 7 or more          | 31     | 1     | 8       | 0     | 32     | 9     | 9       | 3     |

  

| 2008 Knowledge     |        |         |        | 2009 Knowledge |                    |        |         | Combined Years |         |                    |        |       |         |       |        |       |         |       |
|--------------------|--------|---------|--------|----------------|--------------------|--------|---------|----------------|---------|--------------------|--------|-------|---------|-------|--------|-------|---------|-------|
| Pre                |        | Post    |        | Pre            |                    | Post   |         | Pre            |         |                    |        | Post  |         |       |        |       |         |       |
| Question # 8       | Number | Percent | Number | Percent        | Question # 8       | Number | Percent | Number         | Percent | Question # 8       | Number | Range | Percent | Range | Number | Range | Percent | Range |
| Total No. Students | 359    | 100     | 359    | 100            | Total No. Students | 367    | 100     | 367            | 100     | Total No. Students | 363    | 4     | 100     | 0     | 363    | 4     | 100     | 0     |
| Correct            | 335    | 93      | 324    | 90             | Correct            | 341    | 93      | 347            | 95      | Correct            | 338    | 3     | 93      | 0     | 336    | 12    | 92      | 2     |
| Incorrect          | 24     | 7       | 35     | 10             | Incorrect          | 26     | 7       | 20             | 5       | Incorrect          | 25     | 1     | 7       | 0     | 28     | 8     | 8       | 2     |

  

| 2008 Knowledge     |        |         |        | 2009 Knowledge |                    |        |         | Combined Years |         |                    |        |       |         |       |        |       |         |       |
|--------------------|--------|---------|--------|----------------|--------------------|--------|---------|----------------|---------|--------------------|--------|-------|---------|-------|--------|-------|---------|-------|
| Pre                |        | Post    |        | Pre            |                    | Post   |         | Pre            |         |                    |        | Post  |         |       |        |       |         |       |
| Question # 9       | Number | Percent | Number | Percent        | Question # 9       | Number | Percent | Number         | Percent | Question # 9       | Number | Range | Percent | Range | Number | Range | Percent | Range |
| Total No. Students | 359    | 100     | 359    | 100            | Total No. Students | 367    | 100     | 367            | 100     | Total No. Students | 363    | 4     | 100     | 0     | 363    | 4     | 100     | 0     |
| Correct            | 215    | 60      | 353    | 98             | Correct            | 281    | 77      | 353            | 96      | Correct            | 248    | 33    | 68      | 8     | 353    | 0     | 97      | 1     |
| Incorrect          | 144    | 40      | 6      | 2              | Incorrect          | 86     | 23      | 14             | 4       | Incorrect          | 115    | 29    | 32      | 8     | 10     | 4     | 3       | 1     |

  

| 2008 Knowledge     |        |         |        | 2009 Knowledge |                    |        |         | Combined Years |         |                    |        |       |         |       |        |       |         |       |
|--------------------|--------|---------|--------|----------------|--------------------|--------|---------|----------------|---------|--------------------|--------|-------|---------|-------|--------|-------|---------|-------|
| Pre                |        | Post    |        | Pre            |                    | Post   |         | Pre            |         |                    |        | Post  |         |       |        |       |         |       |
| Question # 10      | Number | Percent | Number | Percent        | Question # 10      | Number | Percent | Number         | Percent | Question # 10      | Number | Range | Percent | Range | Number | Range | Percent | Range |
| Total No. Students | 359    | 100     | 359    | 100            | Total No. Students | 367    | 100     | 367            | 100     | Total No. Students | 363    | 4     | 100     | 0     | 363    | 4     | 100     | 0     |
| Correct            | 304    | 85      | 262    | 73             | Correct            | 309    | 84      | 280            | 76      | Correct            | 307    | 3     | 84      | 0     | 271    | 9     | 75      | 2     |
| Incorrect          | 55     | 15      | 97     | 27             | Incorrect          | 58     | 16      | 87             | 24      | Incorrect          | 57     | 2     | 16      | 0     | 92     | 5     | 25      | 2     |

  

| 2008 Knowledge     |        |         |        | 2009 Knowledge |                    |        |         | Combined Years |         |                    |        |       |         |       |        |       |         |       |
|--------------------|--------|---------|--------|----------------|--------------------|--------|---------|----------------|---------|--------------------|--------|-------|---------|-------|--------|-------|---------|-------|
| Pre                |        | Post    |        | Pre            |                    | Post   |         | Pre            |         |                    |        | Post  |         |       |        |       |         |       |
| Question # 11      | Number | Percent | Number | Percent        | Question # 11      | Number | Percent | Number         | Percent | Question # 11      | Number | Range | Percent | Range | Number | Range | Percent | Range |
| Total No. Students | 359    | 100     | 359    | 100            | Total No. Students | 367    | 100     | 367            | 100     | Total No. Students | 363    | 4     | 100     | 0     | 363    | 4     | 100     | 0     |
| Correct            | 294    | 82      | 306    | 85             | Correct            | 325    | 89      | 318            | 87      | Correct            | 310    | 16    | 85      | 3     | 312    | 6     | 86      | 1     |
| Incorrect          | 65     | 18      | 53     | 15             | Incorrect          | 42     | 11      | 49             | 13      | Incorrect          | 54     | 12    | 15      | 3     | 51     | 2     | 14      | 1     |

  

| 2008 Knowledge     |        |         |        | 2009 Knowledge |                    |        |         | Combined Years |         |                    |        |       |         |       |        |       |         |       |
|--------------------|--------|---------|--------|----------------|--------------------|--------|---------|----------------|---------|--------------------|--------|-------|---------|-------|--------|-------|---------|-------|
| Pre                |        | Post    |        | Pre            |                    | Post   |         | Pre            |         |                    |        | Post  |         |       |        |       |         |       |
| Question # 12      | Number | Percent | Number | Percent        | Question # 12      | Number | Percent | Number         | Percent | Question # 12      | Number | Range | Percent | Range | Number | Range | Percent | Range |
| Total No. Students | 359    | 100     | 359    | 100            | Total No. Students | 367    | 100     | 367            | 100     | Total No. Students | 363    | 4     | 100     | 0     | 363    | 4     | 100     | 0     |
| Correct            | 211    | 59      | 258    | 72             | Correct            | 228    | 62      | 249            | 68      | Correct            | 220    | 9     | 60      | 2     | 254    | 5     | 70      | 2     |
| Incorrect          | 148    | 41      | 101    | 28             | Incorrect          | 139    | 38      | 118            | 32      | Incorrect          | 144    | 5     | 40      | 2     | 110    | 9     | 30      | 2     |

  

| 2008 Knowledge |        |         |        | 2009 Knowledge |               |        |         | Combined Years |         |          |  |      |  |  |  |
|----------------|--------|---------|--------|----------------|---------------|--------|---------|----------------|---------|----------|--|------|--|--|--|
| Pre            |        | Post    |        | Pre            |               | Post   |         | Pre            |         |          |  | Post |  |  |  |
| Question # 13  | Number | Percent | Number | Percent        | Question # 13 | Number | Percent | Number         | Percent | Question |  |      |  |  |  |
