# Supplementary material for: Integration of Information and Scientific Literacy: Promoting Literacy in Undergraduates
Source: Atypon-hosted journal article supplement (doi:10.1187/cbe.10-01-0006), 2010-12-01
Supplement: supp_3.pdf [file supp_3.pdf]

# SMILE Pre-/Post-test

## Attitudinal Assessment: Relevancy Items

1. How relevant to your future USP courses is using journal databases and accessing primary literature?

Answer

2. How relevant to your future USP courses is analyzing published data?

Answer

3. How relevant to your future USP courses is understanding the scientific method?

Answer

## Knowledge Assessment: Prior Reading Experience

4. Primary literature is most accurately described as:

- A. A synthesis of previously published information
- B. A first published research article written by an investigator
- C. A review article used to discuss scientific knowledge in a specific area
- D. A second published research article

5. The best example of secondary literature would be:

- A. A Discover Magazine article concerning advancements in stem cell research
- B. An Animal Behavior article on nestling barn owls
- C. An article in the journal Science written by the investigator that conducted the research
- D. An article in the educational journal College Science Teaching about assessment of information literacy skills in first year college students
- E. An article in the journal Nature

6. In the last year, how many scientific research articles have you read that include the following two criteria: (a) contain a clearly stated Abstract, Introduction, Methods, Results and Discussion sections; and (b) were written by the scientists conducting the research.

Answer

7. In the last year, how many articles have you read where someone else summarized the research of a scientist or group of scientists? (Example: Discover Magazine or the news column of a newspaper)

Answer

### **Knowledge Assessment: Scientific Inquiry**

8. Which of the following statements about the scientific method is most accurate?
- A. The scientific method is different depending on the field of study
  - B. The scientific method is used to prove whether a phenomenon is factual or not
  - C. The scientific method is a process for testing hypotheses by observations and/or experiments
  - D. The scientific method is an infallible set of rules used in scientific investigations

### **Knowledge Assessment: Data Comprehension**

9. The graphical representation of data in a research article is best labeled as a:
- A. figure
  - B. citation
  - C. table
  - D. sidebar
10. A table in a scientific article is:
- A. The author's opinion about experimental results
  - B. A textual representation of data
  - C. A description of the content in the article
  - D. An orderly arrangement of data in columns and rows

### **Knowledge Assessment: Use of Technology in Education**

For questions 14 through 18, please indicate which of the following technologies would be most useful in completing the following tasks. Check only one.

**11. Find and complete an assignment online for a course at USP.**

- A. Microsoft Word
- B. Angel
- C. Proquest
- D. Science Direct
- E. Google Scholar

**12. Search for magazines and scholarly articles with restricted access**

- A. Microsoft Word
- B. Angel
- C. Proquest
- D. Science Direct
- E. Google Scholar

**13. Find a journal article from a specific journal**

- A. Microsoft Word
- B. Angel
- C. Proquest
- D. Science Direct
- E. Google Scholar

14. Search for a scientific article from most computers without needing special access

- A. Microsoft Word
- B. Angel
- C. Proquest
- D. Science Direct
- E. Google Scholar

15. Write a term paper for a course at USP

- A. Microsoft Word
- B. Angel
- C. Proquest
- D. Science Direct
- E. Google Scholar

**Knowledge Assessment: Plagiarism Issues**

16. Plagiarism is:

- A. Using information from a published source under any circumstances
- B. Not a problem when it is done unintentionally
- C. Paraphrasing other people's ideas even when you cite the source of those ideas
- D. representing someone else's work as your own

17. To avoid being charged with plagiarism, a writer must show the source of all information cited in a paper with the exception of:

- A. lines of argument
- B. results
- C. theories
- D. common knowledge
